# Supplementary material for: Burden trends and future predictions for hypertensive heart disease attributable to non-optimal temperatures in the older adults amidst climate change, 1990–2021
Source: Front Public Health. 2025 Jan 3;12:1525357. doi: 10.3389/fpubh.2024.1525357 (PMC11738906; doi:10.3389/fpubh.2024.1525357)
Supplement: Supplementary file 1 [file Table_1.xlsx]

## Sheet: Supplementary Table 1
location	High temperature						Low temperature						Non-optimal temperature
	ASMR		EAPC_ASMR	ASDR		EAPC_ASDR	ASMR		EAPC_ASMR	ASDR		EAPC_ASDR	ASMR		EAPC_ASMR	ASDR		EAPC_ASDR
	High temperature_1990	High temperature_2021	High temperature	High temperature_1990	High temperature_2021	High temperature	Low temperature_1990	Low temperature_2021	Low temperature	Low temperature_1990	Low temperature_2021	Low temperature	Non-optimal temperature_1990	Non-optimal temperature_2021	Non-optimal temperature	Non-optimal temperature_1990	Non-optimal temperature_2021	Non-optimal temperature
Andean Latin America	-0.16 (-0.32, -0.09)	-0.05 (-0.14, 0.02)	0 (0, 0)	-2.4 (-4.73, -1.35)	-0.74 (-1.94, 0.42)	0 (0, 0)	7.26 (5.6, 9.2)	4.16 (2.96, 5.6)	-1.56 (-1.89, -1.22)	109.02 (83.23, 138.84)	59.52 (41.98, 81)	-1.73 (-2.07, -1.39)	7.11 (5.47, 9)	4.11 (2.92, 5.51)	-1.57 (-1.91, -1.22)	106.78 (81.37, 135.8)	58.83 (41.4, 79.76)	-1.74 (-2.09, -1.39)
Australasia	0.01 (-0.07, 0.08)	0 (-0.04, 0.04)	2.33 (-0.26, 5)	0.09 (-0.95, 1.07)	0.03 (-0.48, 0.54)	2.04 (-0.59, 4.74)	2.26 (1.71, 2.86)	1.52 (1.13, 1.93)	-1.41 (-1.81, -1)	30.8 (23.53, 38.87)	18.93 (14.29, 24.02)	-1.77 (-2.22, -1.31)	2.27 (1.73, 2.86)	1.52 (1.14, 1.92)	-1.39 (-1.79, -0.99)	30.89 (23.77, 38.8)	18.96 (14.52, 23.89)	-1.75 (-2.21, -1.3)
Caribbean	-0.5 (-0.89, -0.25)	-0.4 (-0.7, -0.12)	0 (0, 0)	-8.49 (-15.38, -4.1)	-6.72 (-11.53, -2.15)	0 (0, 0)	1.28 (0.99, 1.67)	1.19 (0.93, 1.51)	0 (-0.6, 0.6)	20.32 (15.59, 26.9)	19.08 (14.92, 24.37)	-0.1 (-0.67, 0.48)	0.78 (0.24, 1.36)	0.79 (0.34, 1.29)	-1.93 (-9.17, 5.89)	11.9 (2.48, 21.54)	12.41 (5.25, 20.45)	-2.45 (-11.29, 7.27)
Central Asia	0.35 (-0.73, 1.52)	1.1 (-1.22, 3.48)	4.07 (3.07, 5.07)	5.69 (-12.07, 24.67)	18.13 (-18.83, 56.58)	4 (3, 5.02)	10.83 (8.43, 13.69)	14.3 (11.36, 17.35)	1.43 (0.86, 2.01)	176.32 (138.78, 217.31)	222.11 (176.57, 270.86)	1.08 (0.49, 1.67)	11.14 (7.93, 14.66)	15.29 (11.18, 19.54)	1.52 (0.96, 2.08)	181.37 (130.41, 233.82)	238.36 (173.07, 307.44)	1.18 (0.61, 1.75)
Central Europe	-0.11 (-0.93, 0.52)	0.16 (-1.29, 1.47)	23.98 (7.66, 42.77)	-1.66 (-14.25, 7.86)	2.26 (-18.37, 21.17)	32 (10.06, 58.3)	16.58 (14.39, 19.15)	19.47 (16.63, 22.45)	0.66 (0.37, 0.94)	253.19 (220.65, 291.45)	276.36 (237.29, 318.62)	0.36 (0.08, 0.65)	16.48 (13.77, 19.17)	19.61 (16.03, 22.69)	0.68 (0.4, 0.97)	251.68 (211.05, 291.99)	278.37 (228.76, 322.34)	0.39 (0.11, 0.68)
Central Latin America	-0.31 (-0.64, -0.11)	0.03 (-0.12, 0.22)	35.95 (23.35, 49.84)	-4.67 (-9.65, -1.7)	0.46 (-1.71, 3.3)	49.62 (31.75, 69.91)	7.67 (6.71, 9.12)	3.44 (2.62, 4.38)	-2.85 (-3.09, -2.6)	111.76 (98.4, 132.74)	48.38 (36.95, 61.68)	-3.02 (-3.28, -2.75)	7.36 (6.3, 8.73)	3.46 (2.67, 4.31)	-2.54 (-2.87, -2.21)	107.27 (92.19, 127.2)	48.79 (37.75, 60.82)	-2.7 (-3.05, -2.35)
Central Sub-Saharan Africa	-2.81 (-8.75, -0.86)	-2.42 (-4.84, -0.74)	0 (0, 0)	-46.96 (-148.12, -14.04)	-38.59 (-77.45, -11.68)	0 (0, 0)	10.74 (5.87, 16.15)	9.43 (5.5, 14.31)	-0.77 (-1.08, -0.46)	178.97 (94.95, 271.6)	149.34 (86.82, 227.21)	-0.95 (-1.27, -0.64)	8 (1.45, 13.67)	7.05 (3.32, 11.25)	-1.13 (-1.67, -0.58)	133.08 (24.15, 229.68)	111.49 (52.6, 177.64)	-1.31 (-1.86, -0.76)
East Asia	1.13 (-2.22, 5.38)	0.72 (-1.16, 3.1)	-0.87 (-1.77, 0.04)	16.34 (-32.21, 78.78)	9.51 (-15.41, 41.01)	-1.2 (-2.11, -0.28)	29.34 (20.55, 35.29)	12.83 (8.45, 17.15)	-2.76 (-3.16, -2.36)	428.5 (290.93, 518.12)	171.92 (114.3, 229.41)	-3.06 (-3.47, -2.63)	30.36 (20.61, 37.62)	13.48 (8.75, 18.49)	-2.69 (-3.09, -2.29)	443.22 (293.74, 551.71)	180.59 (118.44, 246.35)	-2.98 (-3.4, -2.57)
Eastern Europe	-0.01 (-0.08, 0.04)	0.05 (-0.28, 0.32)	24.77 (10.04, 41.46)	-0.22 (-1.4, 0.63)	0.73 (-4.43, 5.09)	30.62 (9.09, 56.4)	2.48 (2.07, 2.84)	4.44 (3.47, 5.38)	1.97 (1.13, 2.82)	42.74 (35.72, 49)	69.05 (53.88, 84.05)	1.48 (0.59, 2.37)	2.47 (2.02, 2.85)	4.48 (3.32, 5.64)	2 (1.15, 2.86)	42.53 (34.77, 49.31)	69.7 (51.28, 88.28)	1.51 (0.62, 2.41)
Eastern Sub-Saharan Africa	-0.12 (-1.13, 1.15)	0.13 (-0.81, 1.42)	22.83 (11.72, 35.06)	-1.33 (-17.37, 19.26)	2.27 (-12.27, 22.8)	32.11 (16.17, 50.24)	20.82 (13.64, 27.71)	14.04 (9.39, 19.36)	-1.66 (-1.86, -1.46)	340.5 (218.04, 455.07)	214.07 (143.84, 291.87)	-1.93 (-2.13, -1.72)	20.71 (13.45, 27.48)	14.17 (9.56, 19.18)	-1.62 (-1.82, -1.41)	339.35 (215.25, 451.69)	216.34 (146.49, 288.82)	-1.89 (-2.1, -1.67)
Global	0.55 (-0.66, 2.11)	0.75 (-0.48, 2.31)	1.65 (1.18, 2.11)	9.12 (-10.28, 34.57)	12.14 (-6.74, 36.08)	1.46 (1, 1.93)	11.04 (8.79, 12.65)	8.1 (6.47, 9.56)	-0.97 (-1.14, -0.81)	171.85 (134.66, 197.71)	114.15 (91.84, 134.64)	-1.34 (-1.51, -1.16)	11.54 (8.7, 14.17)	8.8 (6.5, 11.16)	-0.81 (-0.97, -0.65)	180.17 (133.68, 223.8)	125.45 (91.77, 161.41)	-1.14 (-1.31, -0.97)
High SDI	0.13 (-0.31, 0.57)	0.2 (-0.24, 0.7)	2.35 (1.8, 2.9)	2.08 (-4.59, 8.88)	3.68 (-3.27, 11.87)	2.43 (1.92, 2.96)	5.67 (4.82, 6.46)	4.73 (3.79, 5.49)	-0.4 (-0.59, -0.21)	81.57 (70.16, 92.15)	64.36 (52.94, 74.49)	-0.59 (-0.82, -0.36)	5.79 (4.66, 6.59)	4.92 (3.79, 5.85)	-0.33 (-0.51, -0.15)	83.44 (67.63, 94.57)	67.76 (52.6, 81.33)	-0.48 (-0.71, -0.26)
High-income Asia Pacific	0.18 (-0.53, 0.99)	0.04 (-0.15, 0.24)	3.12 (-3.65, 10.36)	2.2 (-6.8, 12.59)	0.47 (-1.85, 2.9)	4.86 (-5.43, 16.27)	7.94 (6.51, 9.19)	2.11 (1.57, 2.62)	-3.88 (-4.63, -3.13)	99.99 (83.07, 115.16)	25.35 (19.41, 31.74)	-4.13 (-4.86, -3.4)	8.1 (6.57, 9.31)	2.15 (1.58, 2.66)	-3.84 (-4.6, -3.08)	101.95 (83.54, 117.09)	25.78 (19.51, 32.26)	-4.09 (-4.83, -3.34)
High-income North America	0.05 (-0.43, 0.48)	0.18 (-0.52, 0.92)	6.73 (4.95, 8.55)	0.74 (-6.89, 7.75)	2.75 (-7.73, 13.95)	6.55 (4.82, 8.3)	3.96 (3.27, 4.56)	5.48 (4.42, 6.37)	0.93 (0.69, 1.18)	63.2 (53.07, 72.36)	82.24 (68.11, 95.22)	0.82 (0.53, 1.1)	4 (3.03, 4.68)	5.65 (4.27, 6.67)	1.03 (0.79, 1.28)	63.87 (48.8, 74.29)	84.75 (64.87, 99.7)	0.92 (0.64, 1.2)
High-middle SDI	0.23 (-0.7, 1.28)	0.32 (-0.77, 1.52)	1.91 (1.08, 2.73)	3.5 (-10.53, 19.45)	4.34 (-10.31, 20.41)	1.43 (0.63, 2.24)	12.1 (10.16, 14.12)	10.12 (8.21, 12.06)	-0.44 (-0.58, -0.29)	178.29 (149.9, 207.67)	132.34 (108.93, 157.88)	-0.91 (-1.04, -0.77)	12.31 (9.97, 14.54)	10.41 (8.15, 12.64)	-0.39 (-0.54, -0.25)	181.45 (146.8, 214.63)	136.3 (106.9, 166.46)	-0.86 (-0.99, -0.73)
Low SDI	1.41 (-0.47, 4.64)	1.84 (-0.25, 4.9)	1.92 (1.34, 2.51)	23.03 (-7.72, 76.98)	29.81 (-3.42, 79.36)	1.81 (1.25, 2.38)	12.33 (8.04, 16.76)	9.13 (6.47, 11.91)	-1.14 (-1.37, -0.9)	205 (129.5, 280.34)	141.11 (99.56, 184.88)	-1.42 (-1.63, -1.2)	13.68 (8.51, 20.75)	10.91 (6.83, 15.97)	-0.73 (-0.94, -0.52)	227.03 (138.06, 346.25)	169.89 (105.07, 251.27)	-0.99 (-1.17, -0.8)
Low-middle SDI	1.77 (-0.54, 5.07)	2.21 (-0.29, 5.45)	1.4 (0.86, 1.95)	28.72 (-8.08, 81.92)	34.89 (-4.47, 85.94)	1.21 (0.66, 1.75)	8.67 (5.49, 13.05)	6.55 (4.14, 9.43)	-0.9 (-1.11, -0.69)	136.9 (85.19, 206.95)	102.38 (64.86, 146.55)	-0.98 (-1.19, -0.78)	10.31 (5.19, 17.41)	8.63 (4.1, 14.42)	-0.41 (-0.59, -0.24)	163.62 (80.94, 279.19)	135.28 (64.28, 225.18)	-0.51 (-0.68, -0.34)
Middle SDI	0.75 (-1.45, 3.77)	0.89 (-0.69, 2.99)	0.79 (0.15, 1.44)	11.67 (-22.56, 58.98)	13.01 (-9.8, 43.1)	0.56 (-0.09, 1.21)	19.83 (13.54, 23.55)	10.39 (7.09, 13.28)	-2.18 (-2.53, -1.83)	308.89 (205.13, 368.33)	147.31 (101.18, 187.32)	-2.5 (-2.85, -2.14)	20.49 (13.61, 25.69)	11.21 (7.56, 14.9)	-2.03 (-2.38, -1.67)	319.06 (207.29, 401.5)	159.13 (107.63, 211.63)	-2.34 (-2.7, -1.98)
North Africa and Middle East	5.39 (-1.49, 14.52)	6.17 (-0.71, 15.06)	0.23 (-0.09, 0.55)	85.17 (-21.74, 228.34)	96.04 (-9.62, 233.94)	0.23 (-0.09, 0.54)	34.19 (24.49, 44.11)	22.18 (16.69, 27.69)	-1.3 (-1.56, -1.03)	516.49 (368.66, 666.27)	320.49 (241.36, 401.26)	-1.5 (-1.73, -1.26)	39.14 (25.33, 55.31)	27.92 (17.73, 39.55)	-1.06 (-1.28, -0.84)	594.89 (381.56, 845.28)	410.01 (255.58, 590.84)	-1.22 (-1.42, -1.02)
Oceania	-0.34 (-0.71, -0.15)	-0.24 (-0.46, -0.14)	0 (0, 0)	-5.54 (-11.85, -2.42)	-4.06 (-7.95, -2.4)	0 (0, 0)	5.45 (2.91, 8.62)	3.9 (2.1, 6.63)	-1.2 (-1.4, -0.99)	97.05 (50.58, 153.09)	68.36 (36.51, 116.88)	-1.23 (-1.43, -1.03)	5.11 (2.6, 8.24)	3.67 (1.89, 6.3)	-1.2 (-1.44, -0.96)	91.61 (45.61, 146.62)	64.41 (33.24, 111.37)	-1.24 (-1.48, -1)
South Asia	1.5 (-0.6, 4.59)	1.78 (-0.32, 4.39)	1.45 (0.77, 2.13)	23.93 (-9.25, 72.88)	27.53 (-4.86, 67.69)	1.23 (0.57, 1.89)	5.59 (2.08, 10.63)	5.12 (1.94, 8.74)	-0.25 (-0.6, 0.1)	88.78 (32.82, 169.07)	79.23 (29.64, 135.49)	-0.38 (-0.72, -0.05)	6.96 (1.54, 14.71)	6.78 (1.69, 12.66)	0.2 (-0.11, 0.51)	110.65 (24.51, 233.94)	104.88 (25.96, 195.64)	0.04 (-0.25, 0.34)
Southeast Asia	-0.39 (-1.29, 0.35)	0.14 (-0.32, 0.84)	30.51 (13.71, 49.79)	-6.39 (-21.54, 5.78)	1.85 (-5.19, 12.53)	37.69 (14.81, 65.12)	3.03 (1.87, 4.46)	1.93 (1.29, 2.6)	-1.87 (-2.25, -1.48)	50.94 (31.15, 74.93)	30.92 (20.52, 41.29)	-2.06 (-2.44, -1.68)	2.65 (1.2, 4.72)	2.07 (1.17, 3.36)	-1.25 (-1.6, -0.9)	44.59 (20.1, 79.51)	32.69 (18.77, 52.34)	-1.5 (-1.85, -1.14)
Southern Latin America	0.07 (-0.29, 0.52)	0.04 (-0.3, 0.45)	3.97 (1.71, 6.28)	1.09 (-4.47, 7.97)	0.57 (-4.09, 6.18)	3.45 (1.22, 5.73)	11.87 (10.04, 14.1)	9.83 (7.97, 11.92)	-0.24 (-0.47, -0.02)	179.92 (153.21, 213.17)	130.76 (107.29, 157.96)	-0.72 (-0.92, -0.52)	11.93 (10.11, 14.04)	9.87 (8.15, 11.76)	-0.23 (-0.45, 0)	180.91 (154.24, 212.27)	131.29 (109.85, 155.92)	-0.7 (-0.9, -0.5)
Southern Sub-Saharan Africa	-0.12 (-0.79, 0.64)	-0.06 (-0.94, 0.97)	16.95 (5.17, 30.04)	-1.8 (-12.32, 10.1)	-0.89 (-14.51, 15.12)	22.31 (6.74, 40.14)	22.28 (17.62, 30.05)	27.39 (22.26, 35.05)	0.54 (0.03, 1.04)	337.22 (269.88, 454.37)	416.84 (342.7, 530.21)	0.54 (0, 1.08)	22.17 (17.37, 29.83)	27.34 (22.38, 34.65)	0.55 (0.05, 1.06)	335.56 (266.15, 450.97)	416.03 (344.15, 524.36)	0.56 (0.02, 1.09)
Tropical Latin America	-0.45 (-0.78, 0.04)	-0.17 (-0.32, 0.07)	0 (0, 0)	-7 (-12.3, 0.64)	-2.58 (-4.77, 1.04)	0 (0, 0)	5.75 (4.98, 6.51)	3.23 (2.63, 3.79)	-2.28 (-2.61, -1.95)	92.68 (81.25, 104.44)	48.27 (40.3, 56.37)	-2.6 (-2.94, -2.25)	5.32 (4.37, 6.29)	3.06 (2.44, 3.65)	-2.29 (-2.63, -1.94)	85.81 (71.19, 101.11)	45.72 (37.24, 54.15)	-2.61 (-2.97, -2.25)
Western Europe	-0.02 (-0.21, 0.11)	0.04 (-0.19, 0.28)	34.94 (21.76, 49.56)	-0.25 (-2.75, 1.47)	0.5 (-2.16, 3.21)	47.26 (28.99, 68.11)	6.56 (5.54, 7.82)	6.53 (5.11, 7.82)	0.26 (0.05, 0.47)	88.87 (76.1, 105.38)	75.66 (60.61, 89.92)	-0.27 (-0.46, -0.09)	6.54 (5.48, 7.8)	6.57 (5.13, 7.81)	0.28 (0.07, 0.5)	88.64 (75.01, 105.13)	76.11 (60.79, 89.8)	-0.25 (-0.44, -0.06)
Western Sub-Saharan Africa	2.75 (0.45, 6.78)	3.8 (1.35, 8.08)	1.68 (1.06, 2.32)	48.09 (9.11, 118.88)	64.39 (23.07, 137.64)	1.56 (0.95, 2.17)	2.79 (1.14, 5.39)	1.35 (0.57, 2.48)	-2.32 (-2.91, -1.73)	46.52 (18.63, 91.82)	22.31 (9.3, 41.5)	-2.36 (-2.95, -1.76)	5.47 (1.95, 11.89)	5.1 (1.97, 10.43)	-0.2 (-0.53, 0.13)	93.54 (33.43, 205.93)	85.94 (33.17, 177.15)	-0.25 (-0.58, 0.08)
